# Supplementary material
Source: PubMed Central journal article supplement (PMC9873843)
Supplement: NIHMS1825843-supplement-supinfo3.pdf [file NIHMS1825843-supplement-supinfo3.pdf]

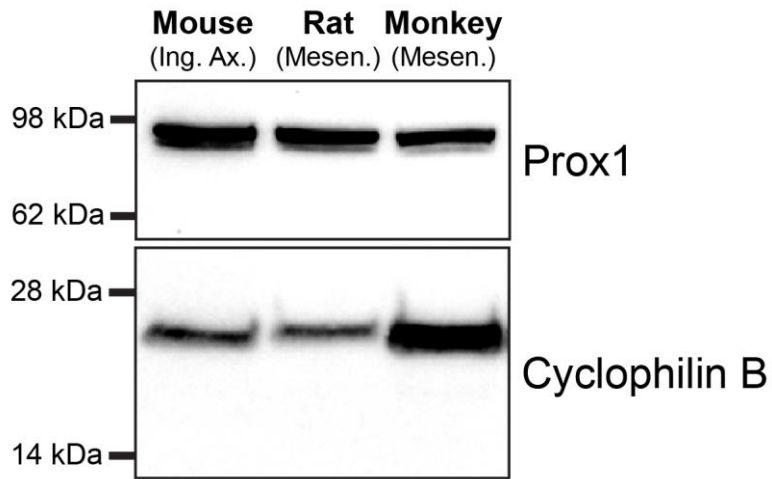

**Supplemental Figure 1. Prox1 Expression in Cultures of Primary LECs Isolated from Different Species and Anatomical Regions.** Representative western blot showing expression of Prox1 and Cyclophilin B in protein lysates prepared from primary cultures of LECs from mouse inguinal axillary vessels, and mesenteric collecting lymphatics from rat and monkey respectively.

| Product                          | Strand | Sequence (5'-3')                | Amplicon (bp) | Exon |
|----------------------------------|--------|---------------------------------|---------------|------|
| <b>Prox1</b>                     | s      | GTA AGA CAT CAC CGC GTG C       | 218           | 1    |
|                                  | as     | TCA TGG TCA GGC ATC ACT GG      |               | 2    |
| <b>eNos</b>                      | s      | CTG CCA CCT GAT CCT AAC TTG     | 143           | 22   |
|                                  | as     | CAG CCA AAC ACC AAA GTC ATG     |               | 23   |
| <b>Cdh5</b>                      | s      | CTT CCT TAC TGC CCT CAT TGT     | 313           | 3    |
|                                  | as     | CTG TTT CTC TCG GTC CAA GTT     |               | 5    |
| <b>Fit4</b>                      | s      | AAG ACC CCG ACT ATG TCC GA      | 262           | 23   |
|                                  | as     | CAA CTC TGC ATG ATG TGG CG      |               | 26   |
| <b>Pecam1</b>                    | s      | CTG CCA GTC CGA AAA TGG AAC     | 218           | 1    |
|                                  | as     | CTT CAT CCA CTG GGG CTA TC      |               | 3    |
| <b>Myh11</b>                     | s      | AAG CTG CGG CTA GAG GTC A       | 238           | 33   |
|                                  | as     | CCC TCC CTT TGA TGG CTG AG      |               | 34   |
| <b><math>\alpha</math>-actin</b> | s      | GAG CTA CGA ACT GCC TGA C       | 129           | 7    |
|                                  | as     | CTG TTA TAG GTG GTT TCG TGG A   |               | 8    |
| <b>CaV1.2</b>                    | as     | GGA ACT GAC GGT AGA GAT GGT TGC | 234           | 2    |
|                                  | s      | ATG GTC AAT GAA AAC ACG AGG ATG |               | 1    |
| <b>Calponin1</b>                 | s      | AGA AAT ACG ACC ATC AGC GG      | 149           | 2    |
|                                  | as     | CTT CAC AGA ACC CGG CTG         |               | 3    |
| <b>Pdgfra</b>                    | s      | AGA GTT ACA CGT TTG AGC TGT C   | 252           | 8    |
|                                  | as     | GTC CCT CCA CGG TAC TCC T       |               | 10   |
| <b>Pdgfr<math>\beta</math></b>   | s      | AGC TAC ATG GCC CCT TAT GA      | 367           | 16   |
|                                  | as     | GGA TCC CAA AAG ACC AGA CA      |               | 19   |
| <b>NG2</b>                       | as     | CTT CAC GAT CAC CAT CCT TCC     | 132           | 6    |
|                                  | s      | CCC GAA TCA TTG TCT GTT CCC     |               | 5    |
| <b>Kit</b>                       | s      | CGCCTGCCGAAATGTATGACG           | 162           | 21   |
|                                  | as     | GGTTCTCTGGGTGGGGTTGC            |               | 23   |
| <b>Vimentin</b>                  | s      | CTGTACGAGGAGGAGATGCG            | 249           | 1    |
|                                  | as     | AATTTCTTCTGCAAGGATT             |               | 3    |
| <b>Desmin</b>                    | s      | GTGGATGCAGCCACTCTAGC            | 218           | 3    |
|                                  | as     | TTAGCCGCGATGGTCTCATAC           |               | 4    |
| <b>Cd146</b>                     | s      | CCCAAACCTGGTGTGCGTCTT           | 220           | 1    |
|                                  | as     | GGAAAATCAGTATCTGCCTCTCC         |               | 3    |
| <b>Cd11b</b>                     | s      | ATG GAC GCT GAT GGC AAT ACC     | 203           | 13   |
|                                  | as     | TCC CCA TTC ACG TCT CCC A       |               | 14   |
| <b>Cd34</b>                      | as     | GGT ACA GGA GAA TGC AGG TC      | 119           | 2    |
|                                  | s      | CGT GGT AGC AGA AGT CAA GT      |               | 1    |
| <b>Cx47</b>                      | s      | TCC ACA ATC ATT CCA CCT TCG     | 193           | 1    |
|                                  | as     | CAG AAG CGC ACA TGA GAC AG      |               | 2    |
| <b>Cx45</b>                      | s      | GGT AAC AGG AGT TCT GGT GAA     | 140           | 2    |
|                                  | as     | TCG AAA GAC AAT CAG CAC AGT     |               | 3    |
| <b>Cx43</b>                      | s      | ACA GCG GTT GAG TCA GCT TG      | 106           | 1    |
|                                  | as     | GAG AGA TGG GGA AGG ACT TGT     |               | 2    |
| <b>Cx40</b>                      | s      | GGT CCA CAA GCA CTC CAC AG      | 136           | 1    |
|                                  | as     | CTC AAT GGT ATC GCA CCG GAA     |               | 2    |
| <b>Cx37</b>                      | s      | CCC ACA TCC GAT ACT GGG TG      | 220           | 1    |
|                                  | as     | CGA AGA CGA CCG TCC TCT G       |               | 2    |

**Supplemental Table 1. List of Primers used for RT-PCR.**
